# Supplementary material for: Nutritional Metabolomics: Postprandial Response of Meals Relating to Vegan, Lacto-Ovo Vegetarian, and Omnivore Diets
Source: MDPI journal article supplement (doi:10.3390/nu10081063), 2018-08-10
Supplement: s1 [file s1]

Supplementary material manuscript:

# **Nutritional metabolomics: Postprandial Response of Meals Relating to Vegan-, Lacto-ovo Vegetarian-, and Omnivore Diets**

**Millie Rådjursöga<sup>1,\*</sup>, Helen Lindqvist<sup>1</sup>, Anders Pedersen<sup>2</sup>, Göran Karlsson<sup>2</sup>, Daniel Malmödin<sup>2</sup>, Lars Ellegård<sup>1</sup> and Anna Winkvist<sup>1</sup>**

<sup>1</sup> Department of Internal Medicine and Clinical Nutrition, Sahlgrenska Academy, University of Gothenburg,

Box 459, 405 30 Gothenburg, Sweden; millie.radjursoga@gu.se; helen.lindqvist@gu.se;

lasse.ellegard@nutrition.gu.se; anna.winkvist@nutrition.gu.se

<sup>2</sup> Swedish NMR Centre, University of Gothenburg, Box 465, 405 30 Gothenburg, Sweden;

anders.pedersen@nmr.gu.se; goran.karlsson@nmr.gu.se; daniel.malmodin@gu.se

\* Correspondence: millie.radjursoga@gu.se; Tel.: +46-703-868879

**Table S1.** Meal composition of omnivore breakfast

| Food                         | Breakfast size |              |
|------------------------------|----------------|--------------|
|                              | 550 kcal (g)   | 750 kcal (g) |
| Rye bred                     | 90             | 123          |
| Liver pâté                   | 25             | 32           |
| Smoked ham                   | 30             | 41           |
| Egg                          | 54             | 75           |
| Red bell pepper              | 22             | 30           |
| Butter and margarine mix 75% | 12             | 17           |
| Cucumber                     | 20             | 27           |
| Red caviar                   | 10             | 14           |
| Tea                          | 150            | 150          |
| Milk (1.5%)                  | 51             | 70           |

**Table S2.** Meal composition of lacto ovo vegetarian breakfast

| Food                         | Breakfast size |              |
|------------------------------|----------------|--------------|
|                              | 550 kcal (g)   | 750 kcal (g) |
| Rye bred                     | 90             | 123          |
| Hard cheese 28%              | 24             | 32           |
| Tomato                       | 25             | 34           |
| Cottage cheese 4%            | 47             | 64           |
| Apple                        | 20             | 27           |
| Butter and margarine mix 75% | 12             | 17           |
| Fruit yoghurt 1.7%           | 100            | 136          |
| Tea                          | 150            | 150          |
| Milk (1.5%)                  | 51             | 70           |

**Table S3.** Meal composition of vegan breakfast

| Food                                    | Breakfast size |              |
|-----------------------------------------|----------------|--------------|
|                                         | 550 kcal (g)   | 750 kcal (g) |
| Rye bred                                | 90             | 123          |
| Banana                                  | 30             | 40           |
| Soy yoghurt blueberries                 | 100            | 136          |
| Olive oil <sup>1</sup>                  | 2              | 3            |
| Lentils green (dry weight) <sup>1</sup> | 11             | 15           |
| Red bell pepper <sup>1</sup>            | 9              | 12           |
| Green bell pepper                       | 25             | 35           |
| Cashew nut butter                       | 22             | 30           |
| Tea                                     | 150            | 150          |
| Oat milk                                | 50             | 68           |

<sup>1</sup>Included in lentil spread

**Table S4.** Nutrients content of breakfast meals

| Nutrients          | Vegan    |          | Lacto ovo vegetarian |          | Omnivore |          |
|--------------------|----------|----------|----------------------|----------|----------|----------|
|                    | 550 kcal | 750 kcal | 550 kcal             | 750 kcal | 550 kcal | 750 kcal |
| Energy (kJ)        | 2297     | 3138     | 2301                 | 3146     | 2301     | 3146     |
| Energy (kcal)      | 549      | 750      | 550                  | 752      | 550      | 752      |
| Protein (g)        | 19       | 26       | 24                   | 33       | 26       | 35       |
| Protein (E%)       | 14       | 14       | 18                   | 18       | 18       | 18       |
| Fat (g)            | 17       | 23       | 22                   | 30       | 26       | 36       |
| Fat (E%)           | 28       | 28       | 35                   | 35       | 44       | 44       |
| Carbohydrates (g)  | 74       | 100      | 60                   | 81       | 50       | 68       |
| Carbohydrates (E%) | 58       | 58       | 47                   | 47       | 38       | 38       |
| Fiber (g)          | 9.9      | 13.5     | 6.9                  | 9.4      | 5.8      | 7.9      |

**Table S5.** Model statistics of discriminant analysis and effect projections models

|                                                   | Model           |                             |                 |                  |                 |                        |                        |
|---------------------------------------------------|-----------------|-----------------------------|-----------------|------------------|-----------------|------------------------|------------------------|
|                                                   | O2PLS-DA        | O2PLS-DA                    | OPLS-EP         | OPLS-EP          | OPLS-EP         | OPLS-EP                | OPLS-EP                |
|                                                   | 3h <sup>1</sup> | $\Delta$ 3h-0h <sup>2</sup> | VE <sup>3</sup> | LOV <sup>4</sup> | OM <sup>5</sup> | LOV vs VE <sup>6</sup> | LOV vs OM <sup>7</sup> |
| No of LV <sup>8</sup>                             | 2+9+0           | 2+7+0                       | 1+2+0           | 1+1+0            | 1+1+0           | 1+1+0                  | 1+1+0                  |
| N samples                                         | 60              | 57                          | 19              | 19               | 19              | 28                     | 26                     |
| n samples pred. set                               | 27              | 21                          | -               | -                | -               | -                      | -                      |
| n variables                                       | 196             | 196                         | 196             | 196              | 196             | 196                    | 196                    |
| R <sup>2</sup> X [cum] <sup>9</sup>               | 0.738           | 0.698                       | 0.495           | 0.522            | 0.539           | 0.497                  | 0.399                  |
| R <sup>2</sup> Y [cum] <sup>10</sup>              | 0.906           | 0.878                       | 0.981           | 0.926            | 0.85            | 0.9                    | 0.939                  |
| Q <sup>2</sup> [cum] <sup>11</sup>                | 0.567           | 0.636                       | 0.87            | 0.84             | 0.731           | 0.848                  | 0.832                  |
| CV-ANOVA <sup>12</sup> (p-value)                  | 0.02            | <0.0001                     | <0.0001         | <0.0001          | 0.0003          | <0.0001                | <0.0001                |
| Permutation tests (Q <sup>2</sup> ) <sup>13</sup> | -0.807          | -0.557                      | -               | -                | -               | -                      | -                      |

<sup>1</sup>Model including postprandial (3h) samples<sup>2</sup>Model including samples calculated from an effect matrix ( $\Delta$  from fasting to postprandial state)<sup>3</sup>Vegan breakfast<sup>4</sup>Lacto-ovo vegetarian breakfast

<sup>5</sup>Omnivore breakfast

<sup>6</sup>Lacto-ovo vegetarian vs vegan breakfast

<sup>7</sup>Lacto-ovo vegetarian vs omnivore breakfast

<sup>8</sup>Latent Variables

<sup>9</sup>Cumulative fraction of the sum of squares of X explained by the selected latent variables

<sup>10</sup>Cumulative fraction of the sum of squares of Y explained by the selected latent variables

<sup>11</sup>Cumulative fraction of the sum of squares of Y predicted by the selected latent variables, estimated by cross validation

<sup>12</sup>ANalysis Of VAriance testing of Cross-Validated predictive residuals

<sup>13</sup>The intercept between real and random models, degree of overfit

-Not applicable

**Table S6.** Classification of prediction set in O2PLS-DA models

| True intake | Classification  |                  |                 |         |                             |     |    |         |
|-------------|-----------------|------------------|-----------------|---------|-----------------------------|-----|----|---------|
|             | 3h <sup>1</sup> |                  |                 |         | $\Delta$ 3h-0h <sup>2</sup> |     |    |         |
|             | VE <sup>3</sup> | LOV <sup>4</sup> | OM <sup>5</sup> | Correct | VE                          | LOV | OM | Correct |
| VE          | 8               |                  |                 | 80%     | 6                           |     |    | 86 %    |
| LOV         | 1               | 9                |                 | 90%     |                             | 8   | 1  | 100%    |
| OM          | 1               | 1                | 7               | 100%    | 1                           |     | 5  | 83%     |
| Total (n)   | 10              | 10               | 7               | 27      | 7                           | 8   | 6  | 21      |

<sup>1</sup>Model including postprandial (3h) samples

<sup>2</sup>Model including samples calculated from an effect matrix ( $\Delta$  from fasting to postprandial state)

<sup>3</sup>Vegan breakfast

<sup>4</sup>Lacto-ovo vegetarian breakfast

<sup>5</sup>Omnivore breakfast



**Table S7.** Change in concentration of identified metabolites between fasting and postprandial samples for vegan-, lacto-ovo vegetarian-, and omnivore breakfasts.

| Metabolite           | Chemical shift (ppm <sup>1</sup> ) | Level identification <sup>2</sup> | Vegan breakfast |                      |        | Lakto-ovo-vegetarian breakfast |         |        | Omnivore breakfast |         |        |
|----------------------|------------------------------------|-----------------------------------|-----------------|----------------------|--------|--------------------------------|---------|--------|--------------------|---------|--------|
|                      |                                    |                                   |                 |                      | Fold   |                                |         | Fold   |                    |         | Fold   |
|                      |                                    |                                   | $\Delta$ conc.  | p-value <sup>3</sup> | change | $\Delta$ conc.                 | p-value | change | $\Delta$ conc.     | p-value | change |
| 3-Hydroxybutyrate    | 1.19                               | 2D                                | ↓               | 0.004                | 0.56   | ↓                              | 0.005   | 0.76   | -                  | 0.5     | 0.91   |
| 3-Hydroxyisobutyrate | 1.06                               | 1D                                | -               | 0.7                  | 0.87   | ↑                              | 0.0001  | 1.55   | ↑                  | 0.003   | 1.40   |
| Acetate              | 1.91                               | 2D                                | ↓               | 0.0009               | 0.38   | ↓                              | <0.0001 | 0.44   | ↓                  | 0.0002  | 0.55   |
| Acetoacetate         | 2.27                               | 2D                                | ↓               | 0.04                 | 0.70   | -                              | 0.7     | 0.97   | -                  | 0.4     | 1.10   |
| Acetone              | 2.22                               | 2D                                | ↓               | 0.01                 | 0.73   | -                              | 1.0     | 1.02   | -                  | 0.7     | 0.95   |
| Alanine              | 1.47                               | 2D                                | ↑               | 0.0004               | 1.17   | ↑                              | 0.0009  | 1.23   | ↑                  | 0.03    | 1.13   |
| alfa-Glucose         | 5.23                               | 2D                                | ↓               | 0.03                 | 0.91   | ↓                              | 0.0006  | 0.91   | ↓                  | 0.05    | 0.93   |
| Arginine             | 1.64                               | 2D                                | ↑               | 0.0009               | 1.35   | -                              | 1       | 0.99   | -                  | 0.4     | 1.12   |
| Ascorbate            | 4.51                               | 1D                                | -               | 0.10                 | 1.07   | -                              | 1       | 1.00   | ↑                  | 0.003   | 1.14   |
| Asparagine           | 2.95                               | 1D                                | ↑               | 0.02                 | 1.14   | -                              | 0.4     | 1.04   | ↑                  | 0.04    | 1.10   |

|                                           |      |    |   |        |      |   |         |      |   |         |      |
|-------------------------------------------|------|----|---|--------|------|---|---------|------|---|---------|------|
| Betaine                                   | 3.26 | 2D | ↑ | 0.0003 | 1.17 | - | 0.1     | 1.10 | ↑ | <0.0001 | 1.40 |
| Carnitine & cholines                      | 3.22 | 2D | ↑ | 0.01   | 1.05 | - | 0.07    | 1.06 | ↑ | 0.0004  | 1.08 |
| Choline                                   | 3.19 | 2D | - | 0.6    | 0.99 | - | 0.6     | 1.08 | ↑ | <0.0001 | 1.37 |
| Citrate                                   | 2.51 | 2D | - | 0.7    | 0.98 | - | 0.8     | 0.98 | - | 1       | 0.99 |
| Creatine/Creatine<br>phosphate/Creatinine | 3.03 | 2D | ↓ | 0.004  | 0.88 | - | 0.5     | 0.98 | ↑ | 0.03    | 1.06 |
| Creatinine                                | 4.05 | 2D | ↓ | 0.009  | 0.92 | ↓ | 0.002   | 0.94 | ↓ | 0.02    | 0.94 |
| Formate                                   | 8.45 | 2D | - | 0.8    | 0.99 | - | 0.5     | 0.95 | - | 0.3     | 0.93 |
| Glutamate                                 | 2.34 | 2D | ↑ | 0.02   | 1.24 | ↑ | <0.0001 | 1.64 | ↑ | 0.002   | 1.33 |
| Glutamine                                 | 2.44 | 2D | - | 1      | 1.00 | ↑ | 0.03    | 1.04 | - | 0.2     | 1.04 |
| Glycerol                                  | 3.55 | 2D | - | 0.3    | 0.80 | ↓ | 0.02    | 0.86 | ↓ | 0.05    | 0.85 |
| Glycine                                   | 3.55 | 2D | - | 0.7    | 0.96 | ↓ | 0.01    | 0.92 | - | 0.5     | 1.01 |
| Isoleucine                                | 1.00 | 2D | - | 0.8    | 1.01 | ↑ | 0.0006  | 1.24 | ↑ | <0.0001 | 1.39 |
| Lactate                                   | 4.11 | 2D | - | 0.7    | 0.89 | - | 0.6     | 1.06 | - | 0.5     | 0.91 |
| Leucine                                   | 0.95 | 2D | ↓ | 0.05   | 0.89 | ↑ | 0.003   | 1.15 | ↑ | 0.003   | 1.17 |
| Lysine                                    | 302  | 2D | - | 0.1    | 0.84 | ↑ | 0.0009  | 1.34 | ↑ | 0.0002  | 1.33 |

|                   |      |    |   |         |      |   |         |      |   |         |      |
|-------------------|------|----|---|---------|------|---|---------|------|---|---------|------|
| Mannose           | 5.18 | 1D | ↓ | 0.0004  | 0.59 | ↓ | <0.0001 | 0.70 | ↓ | <0.0001 | 0.77 |
| Methanol          | 3.35 | 1D | ↑ | 0.04    | 1.24 | - | 0.9     | 0.96 | - | 0.2     | 0.89 |
| Methionine        | 2.63 | 2D | ↓ | 0.001   | 0.75 | ↑ | 0.0002  | 1.28 | ↑ | 0.0002  | 1.29 |
| Methylguanidine   | 2.81 | 1D | - | 0.9     | 0.95 | - | 0.1     | 1.09 | - | 0.8     | 0.91 |
| Methylsuccinate   | 1.08 | 1D | - | 0.9     | 0.95 | - | 0.5     | 1.06 | - | 0.3     | 0.90 |
| myo-Inositol      | 3.62 | 2D | ↑ | 0.0005  | 1.18 | ↑ | 0.05    | 1.09 | ↑ | 0.0006  | 1.20 |
| N-Acetylcysteine  | 2.93 | 2D | - | 0.7     | 1.02 | ↑ | <0.0001 | 1.18 | ↑ | 0.001   | 1.22 |
| Nα-Acetyllysine   | 2.99 | 2D | - | 0.7     | 1.01 | - | 0.6     | 0.94 | - | 0.9     | 1.01 |
| O-Acetylcarnitine | 3.18 |    | - | 0.1     | 0.68 | - | 0.1     | 0.74 | - | 0.4     | 0.93 |
| Ornithine         | 3.05 | 2D | ↑ | <0.0001 | 1.29 | ↑ | <0.0001 | 1.32 | ↑ | <0.0001 | 1.40 |
| Proline           | 4.13 | 2D | ↑ | <0.0001 | 1.15 | ↑ | <0.0001 | 1.46 | ↑ | 0.0004  | 1.21 |
| Pyruvate          | 2.36 | 2D | - | 0.6     | 0.84 | - | 1       | 1.05 | - | 0.3     | 0.91 |
| Serine            | 3.95 | 2D | - | 0.9     | 0.99 | - | 0.2     | 1.06 | ↑ | 0.03    | 1.11 |
| Succinic acid     | 2.40 | 2D | ↓ | 0.0005  | 0.49 | ↓ | 0.002   | 0.64 | ↓ | <0.0001 | 0.51 |
| Threonine         | 4.24 | 2D | ↓ | 0.004   | 0.78 | ↑ | 0.004   | 1.08 | ↑ | 0.04    | 1.10 |
| Tyrosine          | 6.88 | 2D | - | 0.9     | 0.97 | ↑ | <0.0001 | 1.38 | ↑ | 0.0003  | 1.25 |

|        |      |    |   |     |      |   |         |      |   |         |      |
|--------|------|----|---|-----|------|---|---------|------|---|---------|------|
| Valine | 0.98 | 2D | - | 0.3 | 1.01 | ↑ | <0.0001 | 1.21 | ↑ | <0.0001 | 1.23 |
|--------|------|----|---|-----|------|---|---------|------|---|---------|------|

---

<sup>1</sup>parts per million

<sup>2</sup>D=identification using chemical shift in HSQC and TOCSY spectra compared to HMDB. 1D=identification using <sup>1</sup>H NMR spectra in Chenomex.

<sup>3</sup>p-value calculations based on Wilcoxon signed rank test comparing the difference between fasting and postprandial (3h) samples.

-No statistical significant (p>0.05) change
